# Supplementary material for: Differential Ecological Specificity of Protist and Bacterial Microbiomes across a Set of Termite Species
Source: Front Microbiol. 2017 Dec 19;8:2518. doi: 10.3389/fmicb.2017.02518 (PMC5742190; doi:10.3389/fmicb.2017.02518)
Supplement: Supplementary file 5 [file DataSheet5.XLSX]

## Sheet: Sheet1
ParSym1CryDomA_AB032214	Eukaryota;Parabasalia;unknownParabasalidSymbiont;
ParSym1CryDomB_AB032215	Eukaryota;Parabasalia;unknownParabasalidSymbiont;
ParSym1CryDomC_AB032216	Eukaryota;Parabasalia;unknownParabasalidSymbiont;
DevSp2CrySecA_FN377763	Eukaryota;Parabasalia;Cristamonadea;Cristamonadida;Lophomonadidae;Devescovina;
CadVer3CryCav_DQ855405	Eukaryota;Parabasalia;Cristamonadea;Cristamonadida;Lophomonadidae;Cadiceia;
DevSp2CryBreB_FN377764	Eukaryota;Parabasalia;Cristamonadea;Cristamonadida;Lophomonadidae;Devescovina;
DevSp2CryDudC_FN377765	Eukaryota;Parabasalia;Cristamonadea;Cristamonadida;Lophomonadidae;Devescovina;
DevSp2CryHavD_FN377766	Eukaryota;Parabasalia;Cristamonadea;Cristamonadida;Lophomonadidae;Devescovina;
DevSp2CryLonE_FN377762	Eukaryota;Parabasalia;Cristamonadea;Cristamonadida;Lophomonadidae;Devescovina;
ParSym2CryHavA_FN377801	Eukaryota;Parabasalia;unknownParabasalidSymbiont;
ParSym2CryHavB_FN377802	Eukaryota;Parabasalia;unknownParabasalidSymbiont;
ParSym4CryCylA_JX975352	Eukaryota;Parabasalia;unknownParabasalidSymbiont;
SteSp5CryCav_AB458857	Eukaryota;Parabasalia;Cristamonadea;Cristamonadida;Lophomonadidae;Stephanonympha;
ParSym6CryDudA_AF052696	Eukaryota;Parabasalia;unknownParabasalidSymbiont;
ParSym6CryBreB_AF052697	Eukaryota;Parabasalia;unknownParabasalidSymbiont;
ParSym6CryBreC_AF052698	Eukaryota;Parabasalia;unknownParabasalidSymbiont;
ParSym6CryBreE_AF052699	Eukaryota;Parabasalia;unknownParabasalidSymbiont;
ParSym6CryBreD_AF052700	Eukaryota;Parabasalia;unknownParabasalidSymbiont;
CthMac4ProSim_JX975349	Eukaryota;Parabasalia;ParabasaliaIncertaeSedis;UndescribedFamily_Cthulhumonads;Cthulhu;
CthMic4ProSim_JX975350	Eukaryota;Parabasalia;ParabasaliaIncertaeSedis;UndescribedFamily_Cthulhumonads;Cthylla;
ParSym4RetVirB_JX183280	Eukaryota;Parabasalia;unknownParabasalidSymbiont;
TriTry7RetSan_X79559	Eukaryota;Parabasalia;Hypotrichomonadea;Hypotrichomonadida;Hypotrichomonadidae;Trichomitus;
DinFim8RetFlaA_AY137593	Eukaryota;Metamonada;Preaxostyla;Oxymonadida;Pyrsonymphidae;Dinenympha;
DinGra8RetFlaA_AY137594	Eukaryota;Metamonada;Preaxostyla;Oxymonadida;Pyrsonymphidae;Dinenympha;
DinSp8RetFla_AY137592	Eukaryota;Metamonada;Preaxostyla;Oxymonadida;Pyrsonymphidae;Dinenympha;
ParSym1RetSpeD_AB032204	Eukaryota;Parabasalia;unknownParabasalidSymbiont;
ParSym1RetSpeE_AB032205	Eukaryota;Parabasalia;unknownParabasalidSymbiont;
ParSym1RetSpeF_AB032206	Eukaryota;Parabasalia;unknownParabasalidSymbiont;
PyrSp8RetFla_AY137595	Eukaryota;Metamonada;Preaxostyla;Oxymonadida;Pyrsonymphidae;Pyrsonympha;
TriSp9RetFlaA_KC494352	Eukaryota;Parabasalia;Trichonymphea;Trichonymphida;Trichonymphidae;Trichonympha;
TriSp9RetFlaB_KC494354	Eukaryota;Parabasalia;Trichonymphea;Trichonymphida;Trichonymphidae;Trichonympha;
TriSp9RetFlaC_KC494357	Eukaryota;Parabasalia;Trichonymphea;Trichonymphida;Trichonymphidae;Trichonympha;
TriSp9RetFlaD_KC494355	Eukaryota;Parabasalia;Trichonymphea;Trichonymphida;Trichonymphidae;Trichonympha;
TriSp9RetFlaE_KC494360	Eukaryota;Parabasalia;Trichonymphea;Trichonymphida;Trichonymphidae;Trichonympha;
TriSp9RetFlaF_KC494356	Eukaryota;Parabasalia;Trichonymphea;Trichonymphida;Trichonymphidae;Trichonympha;
TriSp9RetFlaG_KC494359	Eukaryota;Parabasalia;Trichonymphea;Trichonymphida;Trichonymphidae;Trichonympha;
TriSp9RetFlaH_KC494353	Eukaryota;Parabasalia;Trichonymphea;Trichonymphida;Trichonymphidae;Trichonympha;
TriSp9RetFlaI_KC494358	Eukaryota;Parabasalia;Trichonymphea;Trichonymphida;Trichonymphidae;Trichonympha;
TriSp10RetLucA_AB434785	Eukaryota;Parabasalia;Trichonymphea;Trichonymphida;Trichonymphidae;Trichonympha;
TriSp10RetLucB_AB434786	Eukaryota;Parabasalia;Trichonymphea;Trichonymphida;Trichonymphidae;Trichonympha;
UnkTri11RetFla_U17508	Eukaryota;Parabasalia;Trichomonadea;Trichomonadida;
CalGra12CryBreA_AY063294	Eukaryota;Parabasalia;Cristamonadea;Cristamonadida;Lophomonadidae;Calonympha;
CalGra12CryBreB_AY063295	Eukaryota;Parabasalia;Cristamonadea;Cristamonadida;Lophomonadidae;Calonympha;
CalGra12CryBreC_AY063296	Eukaryota;Parabasalia;Cristamonadea;Cristamonadida;Lophomonadidae;Calonympha;
DevLep2NeoCasA_FN377759	Eukaryota;Parabasalia;Cristamonadea;Cristamonadida;Lophomonadidae;Devescovina;
DevLep2NeoCasB_FN377760	Eukaryota;Parabasalia;Cristamonadea;Cristamonadida;Lophomonadidae;Devescovina;
DinExi13RetSpeA_AB092924	Eukaryota;Metamonada;Preaxostyla;Oxymonadida;Pyrsonymphidae;Dinenympha;
DinExi13RetSpeB_AB092926	Eukaryota;Metamonada;Preaxostyla;Oxymonadida;Pyrsonymphidae;Dinenympha;
DinFim8RetFlaB_AY137593	Eukaryota;Metamonada;Preaxostyla;Oxymonadida;Pyrsonymphidae;Dinenympha;
DinGra8RetFlaB_AY137594	Eukaryota;Metamonada;Preaxostyla;Oxymonadida;Pyrsonymphidae;Dinenympha;
DinPar13RetSpe_AB092925	Eukaryota;Metamonada;Preaxostyla;Oxymonadida;Pyrsonymphidae;Dinenympha;
FoaNan5CryDom_AB458860	Eukaryota;Parabasalia;Cristamonadea;Cristamonadida;Lophomonadidae;Foaina;
HolMir1CopFor_AB032212	Eukaryota;Parabasalia;Spirotrichonymphea;Spirotrichonymphida;Holomastigotoididae;Holomastigotoides;
HolMir14CopForA_JN585010	Eukaryota;Parabasalia;Spirotrichonymphea;Spirotrichonymphida;Holomastigotoididae;Holomastigotoides;
HolMir14CopForB_JN585011	Eukaryota;Parabasalia;Spirotrichonymphea;Spirotrichonymphida;Holomastigotoididae;Holomastigotoides;
OxySp13neoKosA_AB092930	Eukaryota;Metamonada;Preaxostyla;Oxymonadida;Oxymonadidae;Oxymonas;
OxySp13neoKosB_AB092931	Eukaryota;Metamonada;Preaxostyla;Oxymonadida;Oxymonadidae;Oxymonas;
OxySp13neoKosC_AB092932	Eukaryota;Metamonada;Preaxostyla;Oxymonadida;Oxymonadidae;Oxymonas;
PenScr15MasDar_X87131	Eukaryota;Parabasalia;Trichomonadea;Trichomonadida;Trichomonadidae;Pentatrichomonoides;
PseHer16CopTes_HQ683706	Eukaryota;Parabasalia;Trichonymphea;Trichonymphida;Teranymphidae;Pseudotrichonympha;
PyrGra13RetSpeA_AB092942	Eukaryota;Metamonada;Preaxostyla;Oxymonadida;Pyrsonymphidae;Pyrsonympha;
PyrGra13RetSpeB_AB092918	Eukaryota;Metamonada;Preaxostyla;Oxymonadida;Pyrsonymphidae;Pyrsonympha;
PyrGra13RetSpeC_AB092918	Eukaryota;Metamonada;Preaxostyla;Oxymonadida;Pyrsonymphidae;Pyrsonympha;
PyrGra13RetSpeD_AB092920	Eukaryota;Metamonada;Preaxostyla;Oxymonadida;Pyrsonymphidae;Pyrsonympha;
SnyTab17CryLon_FN649413	Eukaryota;Parabasalia;Cristamonadea;Cristamonadida;Lophomonadidae;Snyderella;
SnyTab12CryCavA_AY063288	Eukaryota;Parabasalia;Cristamonadea;Cristamonadida;Lophomonadidae;Snyderella;
SnyTab12CryCavB_AY063289	Eukaryota;Parabasalia;Cristamonadea;Cristamonadida;Lophomonadidae;Snyderella;
SnyTab12CryCavC_AY063290	Eukaryota;Parabasalia;Cristamonadea;Cristamonadida;Lophomonadidae;Snyderella;
SnyTab12CryCavD_AY063291	Eukaryota;Parabasalia;Cristamonadea;Cristamonadida;Lophomonadidae;Snyderella;
SnyTab12CryCavE_AY063292	Eukaryota;Parabasalia;Cristamonadea;Cristamonadida;Lophomonadidae;Snyderella;
SpiSp1HodSjo_AB032226	Eukaryota;Parabasalia;Spirotrichonymphea;Spirotrichonymphida;Holomastigotoididae;Spirotrichonympha;
SteNel3CryDomA_DQ855403	Eukaryota;Parabasalia;Cristamonadea;Cristamonadida;Lophomonadidae;Stephanonympha;
SteNel3CryDomB_DQ855404	Eukaryota;Parabasalia;Cristamonadea;Cristamonadida;Lophomonadidae;Stephanonympha;
TerMir18RetSpeA_AB183877	Eukaryota;Parabasalia;Trichonymphea;Trichonymphida;Teranymphidae;Teranympha;
TerMir18RetSpeB_AB183876	Eukaryota;Parabasalia;Trichonymphea;Trichonymphida;Teranymphidae;Teranympha;
TriSp19Unk_JX512966	Eukaryota;Trichomonadea;Trichomonadida;Trichomonadidae;Trichomonas;
TriAgi20RetFlaA_KC285195	Eukaryota;Parabasalia;Trichonymphea;Trichonymphida;Trichonymphidae;Trichonympha;
TriAgi20RetFlaB_KC285196	Eukaryota;Parabasalia;Trichonymphea;Trichonymphida;Trichonymphidae;Trichonympha;
TriAgi21RetChi_GU461590	Eukaryota;Parabasalia;Trichonymphea;Trichonymphida;Trichonymphidae;Trichonympha;
CrySec_DQ882635	Eukaryota;Animalia;Arthropoda;Insecta;Isoptera;Kalotermitidae;Cryptotermes;
RetFla_JQ972694	Eukaryota;Animalia;Arthropoda;Insecta;Isoptera;Rhinotermitidae;Reticulitermes;
RetFlaB_EF363230	Eukaryota;Animalia;Arthropoda;Insecta;Isoptera;Rhinotermitidae;Reticulitermes;
RetGra_KM245843	Eukaryota;Animalia;Arthropoda;Insecta;Isoptera;Rhinotermitidae;Reticulitermes;
